# Supplementary material
Source: PubMed Central journal article supplement (PMC3950667)
Supplement: supp_gkt1232_nar-02198-m-2013-File006.pdf [file supp_gkt1232_nar-02198-m-2013-File006.pdf]

**Supplementary Table S2:**

| <b>Table S2: List of primers</b>                     |                             |
|------------------------------------------------------|-----------------------------|
| <b>Whole mount RNA in situ hybridization primers</b> |                             |
| Baf250a FWD1                                         | CCAGTCCAATGGATCAGATG        |
| Baf250a REV1                                         | AGAGTGGTCCTGAGCGAGAC        |
| <b>ChIP QPCR primers</b>                             |                             |
| MyE8 FW (E) (-30kb)                                  | GCAAGTTCAAATAACATTCCAGAAG   |
| MyE8 REV (E) (-30kb)                                 | CAATCTTGGTGGGAAATCTTTAGG    |
| cMyocCF (P)                                          | ACAGGGTCCCACGTGCATCATTA     |
| cMyocCR (P)                                          | GGCCTCCACCTGTCATTGTCATTC    |
| cGATA4DF                                             | CAGGGGAGCTTGAGCCGACTAC      |
| cGATA4DR                                             | TGCACTGCTGAATACTACCCACATACA |
| Gata4F (A) (-264 to -187)                            | GGAGCAACCGCAAATCCA          |
| Gata4R (A) (-264 to -187)                            | CAGCATCAAAGCAGAAACCTCTAG    |
| My13F (B) (-1264 to -1164)                           | CCAGCCCCTACTATGGTGTATAGC    |
| My13R (B) (-1264 to -1164)                           | TGGAGCAACTCTTCTGCACAA       |
| cTnTF1 (B) (-1181 to -1047)                          | GGGCTGGACGAATCTGGTTT        |
| cTnTR1 (B) (-1181 to -1047)                          | CCCTTGACGCTTCCAGACA         |
| cTnTF2 (A) (-436 to -335)                            | GAGGTTGACTTCTGCCCTCAAC      |
| cTnTR2 (A) (-436 to -335)                            | TAAACCAGCTGTCCCTCTTGAGA     |
